# Supplementary material
Source: PubMed Central journal article supplement (PMC3624259)
Supplement: MCB.01447-12_zmb999109930so1.pdf [file MCB.01447-12_zmb999109930so1.pdf]

**A**

SH2 domain-containing protein

| Gene name | Fold increase | P value     |                  |
|-----------|---------------|-------------|------------------|
| p85a      | 3.49          | 0.0062(***) | Positive control |
| C1-Ten    | 2.63          | 0.0057(**)  |                  |
| GRAP      | 1.99          | 0.0075(**)  |                  |
| Shc       | 1.93          | 0.005(**)   |                  |
| RIN3      | 1.84          | 0.0324(*)   |                  |
| SUPT6H    | 1.51          | 0.0541(*)   |                  |
| LYN       | 1.44          | 0.0223(*)   |                  |
| EAT2      | 1.82          | 0.2045      |                  |
| Crkl      | 1.60          | 0.0994(&)   |                  |
| NCK2      | 1.42          | 0.0961(&)   |                  |
| TYK2      | 1.32          | 0.1584      |                  |
| NCK1      | 1.26          | 0.3717      |                  |
| SH3BP2    | 1.24          | 0.1735      |                  |
| CHN1      | 1.19          | 0.3275      |                  |
| TEC       | 1.06          | 0.6528      |                  |
| RASA1     | 1.05          | 0.7504      |                  |
| Src       | 1.00          | 0.9896      |                  |
| Abl1      | 0.88          | 0.6256      |                  |
| Vav3      | 0.84          | 0.3529      |                  |
| cTEN      | No expression |             |                  |
| MATK      | No expression |             |                  |
| PKCθ      | 1.84          | 0.0008(***) | Positive control |
| PKCε      | 1.48          | 0.0289(*)   | Positive control |
| PTP1B     | 1.45          | 0.1578      |                  |
| PTEN      | 0.83          | 0.3795      |                  |
| RhoA      | 1.12          | 0.5347      |                  |

**B**

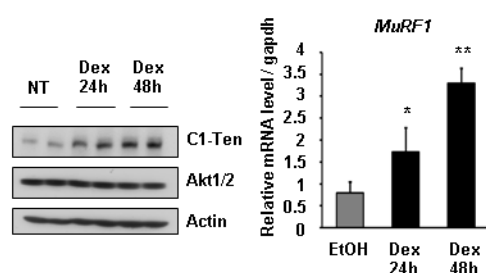

**C**

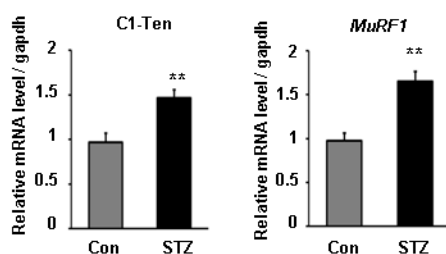

**D**

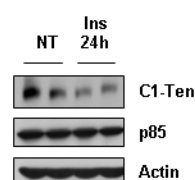

**FIG S1 Upregulation of C1-Ten expression in catabolic muscle.** (A) Expression analysis of SH2 domain-containing proteins in diabetic skeletal muscle. (B) C1-Ten expression was measured in L6 myotubes exposed to 100 nM dexamethasone at day 8 of differentiation (left

panel). Right panel, upregulation of *MuRF1* mRNA in L6 myotubes treated with 100 nM dexamethasone (n = 3). (C) C1-Ten level (left panel) and *MuRF1* level (right panel) in gastrocnemius muscles of streptozotocin (STZ)-treated rats. STZ (100 mg/kg) was dissolved in 0.1 M citrate buffer (pH 4.5) and injected into male rats (~180 g) by the tail vein. 3 days later, the rats were anesthetized, and muscle tissue was harvested (n = 5). *P*-value, compared to the control pair-fed rats. (D) C1-Ten level was measured in L6 myotubes treated with 100 nM insulin for 24 hr at day 6 of differentiation.

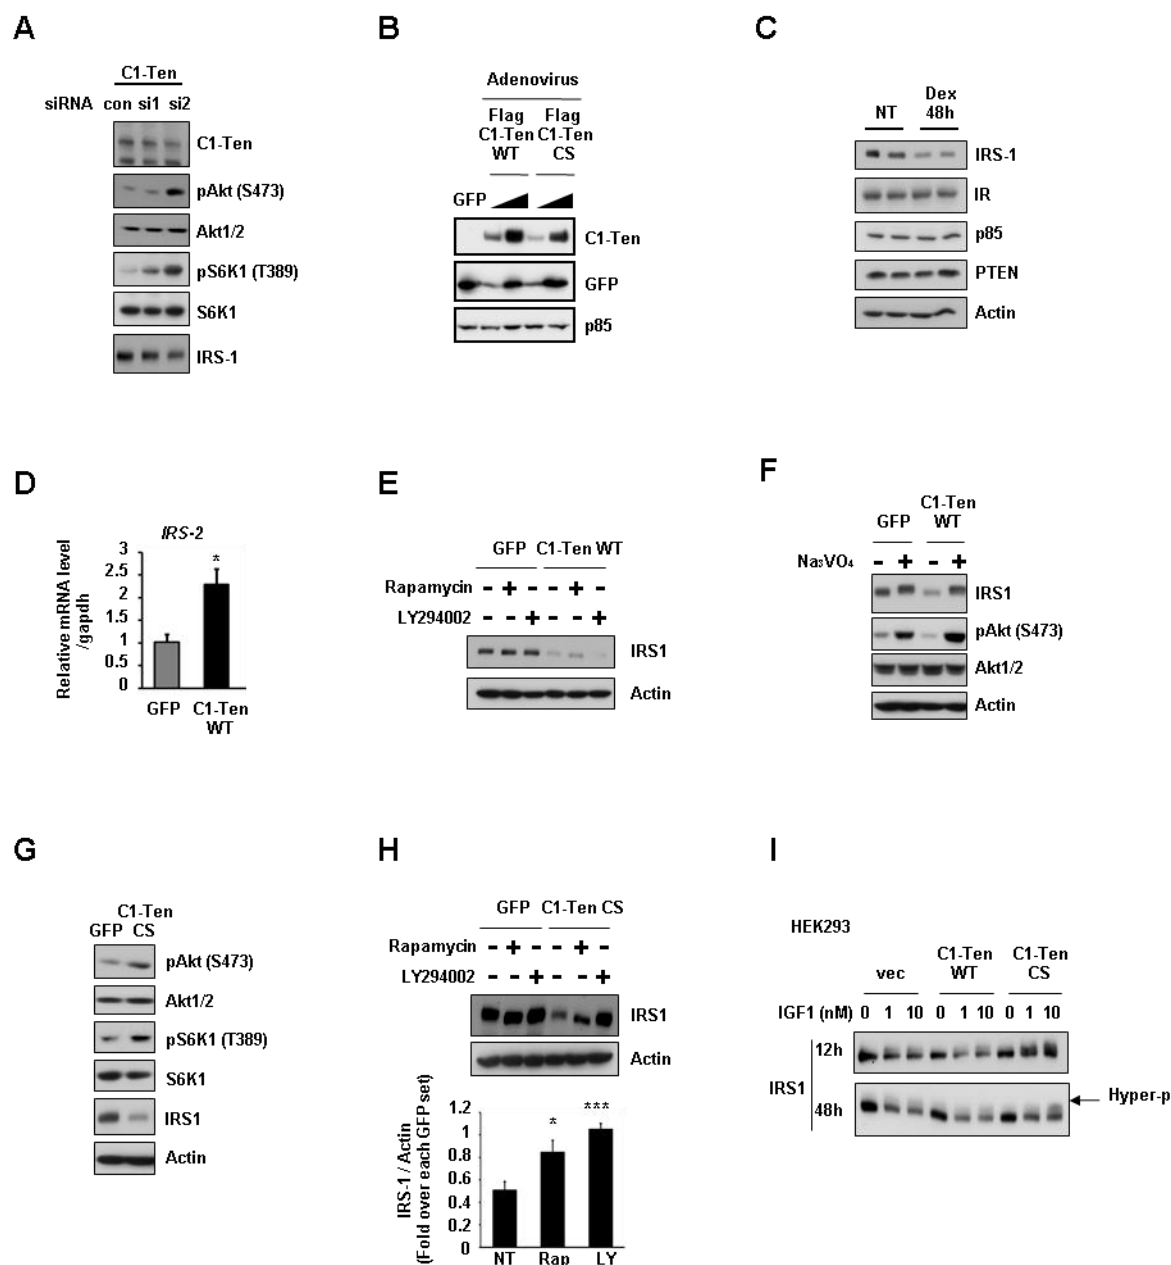

**FIG S2 C1-Ten WT and C1-Ten CS reduce IRS-1 via different mechanisms.** (A) Effect of C1-Ten depletion on Akt/S6K1 signaling. si1 and si2 were used to deplete C1-Ten. Knockdown was done for 24 hr on day 6 of differentiation. (B) Expression of recombinant adenovirus vectors Ad-GFP, Ad-C1-Ten WT, and Ad-C1-Ten CS. L6 myotubes, on day 8 of culture, were infected for 48 hr, followed by immunoblotting. (C) After L6 myotubes at 8 days of culture were treated with 100 nM dexamethasone, IRS-1, IR, p85, and PTEN levels were measured. (D) qRT-PCR of IRS-2 mRNA, normalized to *gapdh* (n = 3). (E) mTOR- and PI3K-independent degradation of IRS-1 by C1-Ten WT. GFP- and C1-Ten WT-expressing

myotubes were treated with 200 nM rapamycin or 10  $\mu$ M LY294002 for 2 hr. (F) The effect of vanadate on C1-Ten-induced IRS-1 degradation was evaluated by the treatment of L6 myotubes with 2 mM  $\text{Na}_3\text{VO}_4$  for 4 hr. (G) The effect of C1-Ten CS on IRS-1 and downstream signaling events. (H) The mTOR- and PI3K-dependent degradation of IRS-1 by C1-Ten CS was determined by treating GFP- and C1-Ten CS- expressing myotubes with 200 nM rapamycin or 10  $\mu$ M LY294002 for 2 hr. Top panel, representative immunoblot; bottom panel, fold-change in IRS-1 was normalized to Actin relative to each GFP set ( $n = 4$ ). *P*-value compared with NT set. (I) Effect of long-term IGF-1 stimulation on IRS-1 in C1-Ten-expressing HEK293 cells. HEK293 cells expressing each Flag construct were treated with 1 nM or 10 nM IGF-1.

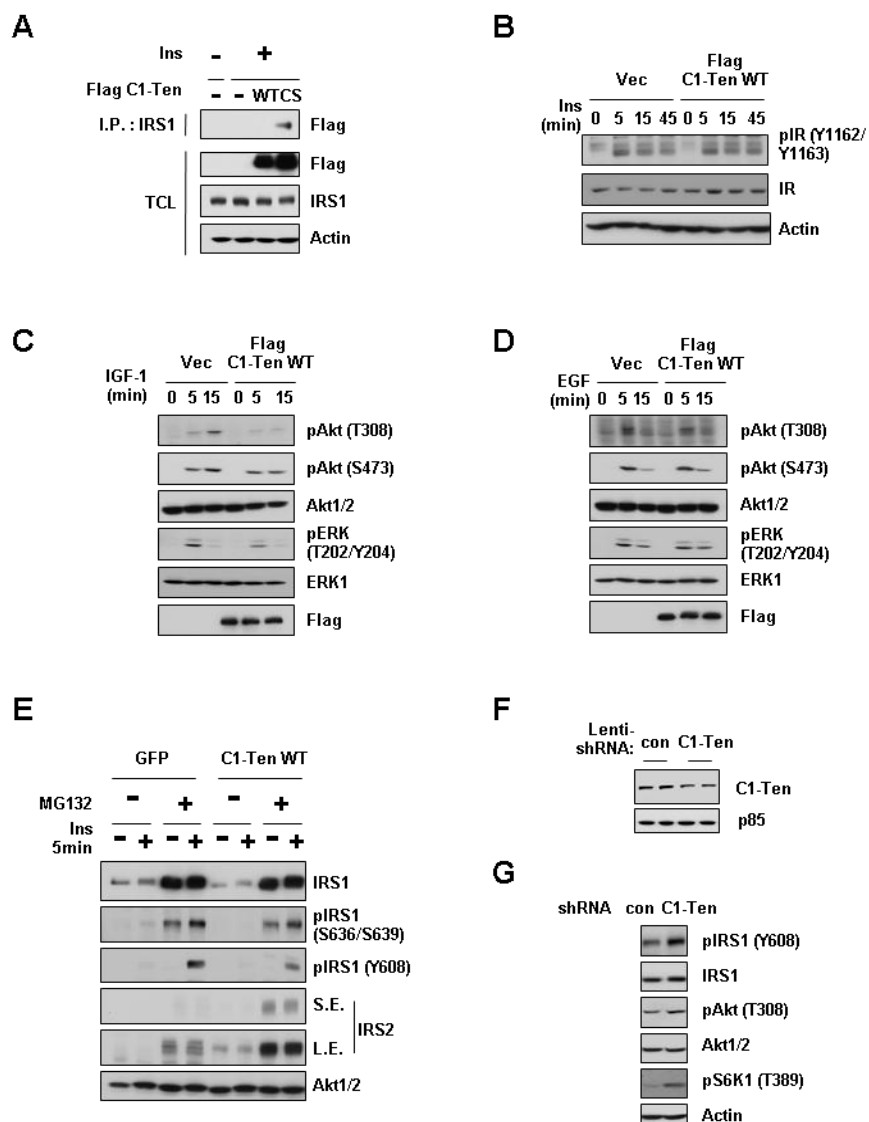

**FIG S3 C1-Ten regulates IRS-1-mediated signaling.** (A) Stable interaction of C1-Ten CS with IRS-1. Immunoprecipitation (IP) was performed with IRS-1 antibody and subjected to immunoblotting (IB) with anti-flag antibody. (B) Effect of C1-Ten on insulin receptor tyrosine phosphorylation. HEK293 cells were transfected with Flag vector alone or Flag C1-Ten WT. After 24 hr, the cells were serum starved for 18 hr, then treated with 50 nM insulin for indicated times. (C) Effect of C1-Ten on IGF-1 signaling in HEK293 cells. Cells were treated with 10 nM IGF-1. (D) Effect of C1-Ten on EGF signaling in HEK293 cells. Cells were treated with 2 nM EGF. (E) The effect of C1-Ten on the serine and tyrosine phosphorylation of IRS-1 was determined by treating serum-starved L6 myotubes with 20  $\mu$ M MG132 for 2 hr, followed by stimulation with 50 nM insulin for 5 min. (F) C1-Ten knockdown in Glut4-expressing L6 myoblasts via lentivirus transduction. (G) Effects of C1-Ten knock-down on IRS-1-mediated signaling in L6 myoblasts.

**A**

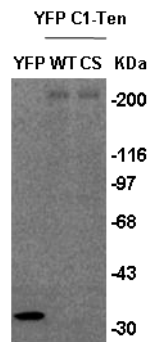

**FIG S4 Expression of YFP constructs used for *in vivo* electroporation.** (A) HEK293 cells were transfected with YFP vector, YFP C1-Ten WT, or YFP C1-Ten CS. After 48 hr, the cells were harvested and used for immunoblotting with GFP antibody.
